# Supplementary material
Source: PubMed Central journal article supplement (PMC5607365)

*Staphylococcus aureus*  
RN6390 (MSSA)

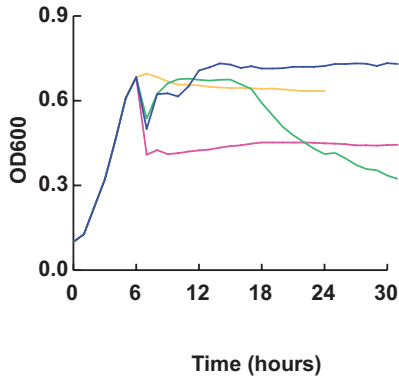

**Legend**

- M14
- NaCl 0.9%
- $\Delta$ wspF supernatant
- Ancestor supernatant

$$\text{Survival} = \log_{10} \left( \frac{\text{CFU}_{24}}{\text{CFU}_{10}} \right)$$

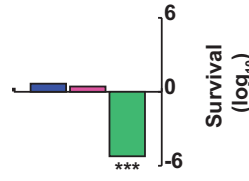

*Staphylococcus aureus*  
USA300 (MRSA)

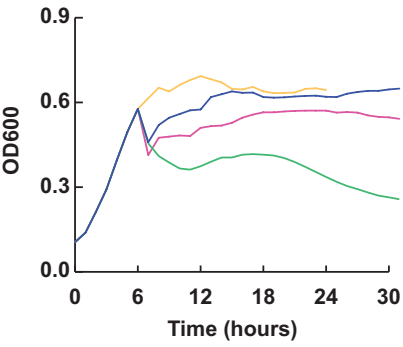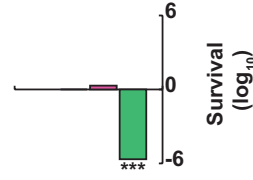

*Staphylococcus epidermidis*  
MT1

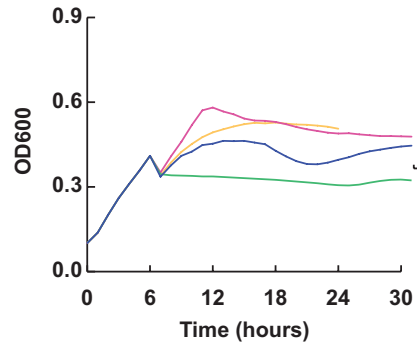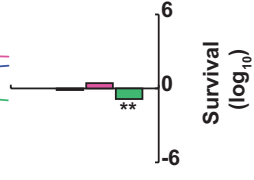

*Actinomyces israelii*  
MT2

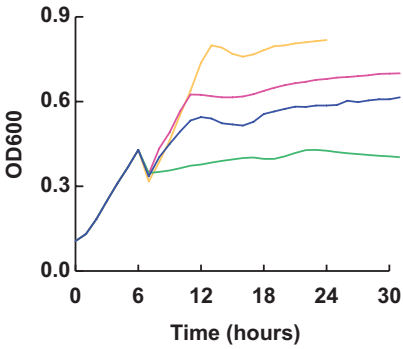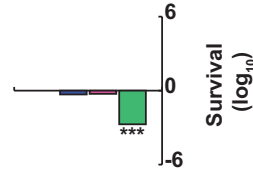

*Rothia mucilaginosa*  
MT3

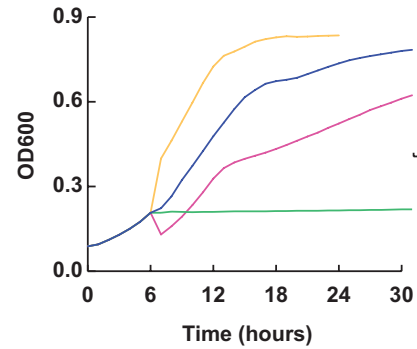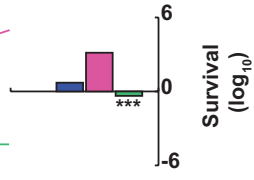

*Neisseria flavescens*  
MT4

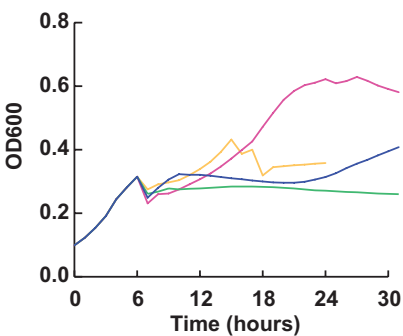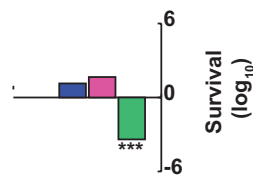

*Klebsiella pneumoniae*  
MT5

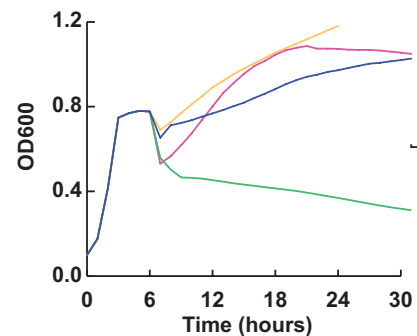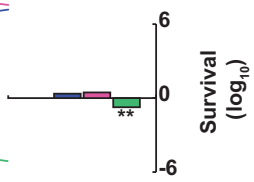

Supplement: ismej201783x8.pdf [file ismej201783x8.pdf]
