# Supplementary material
Source: PubMed Central journal article supplement (PMC5607365)

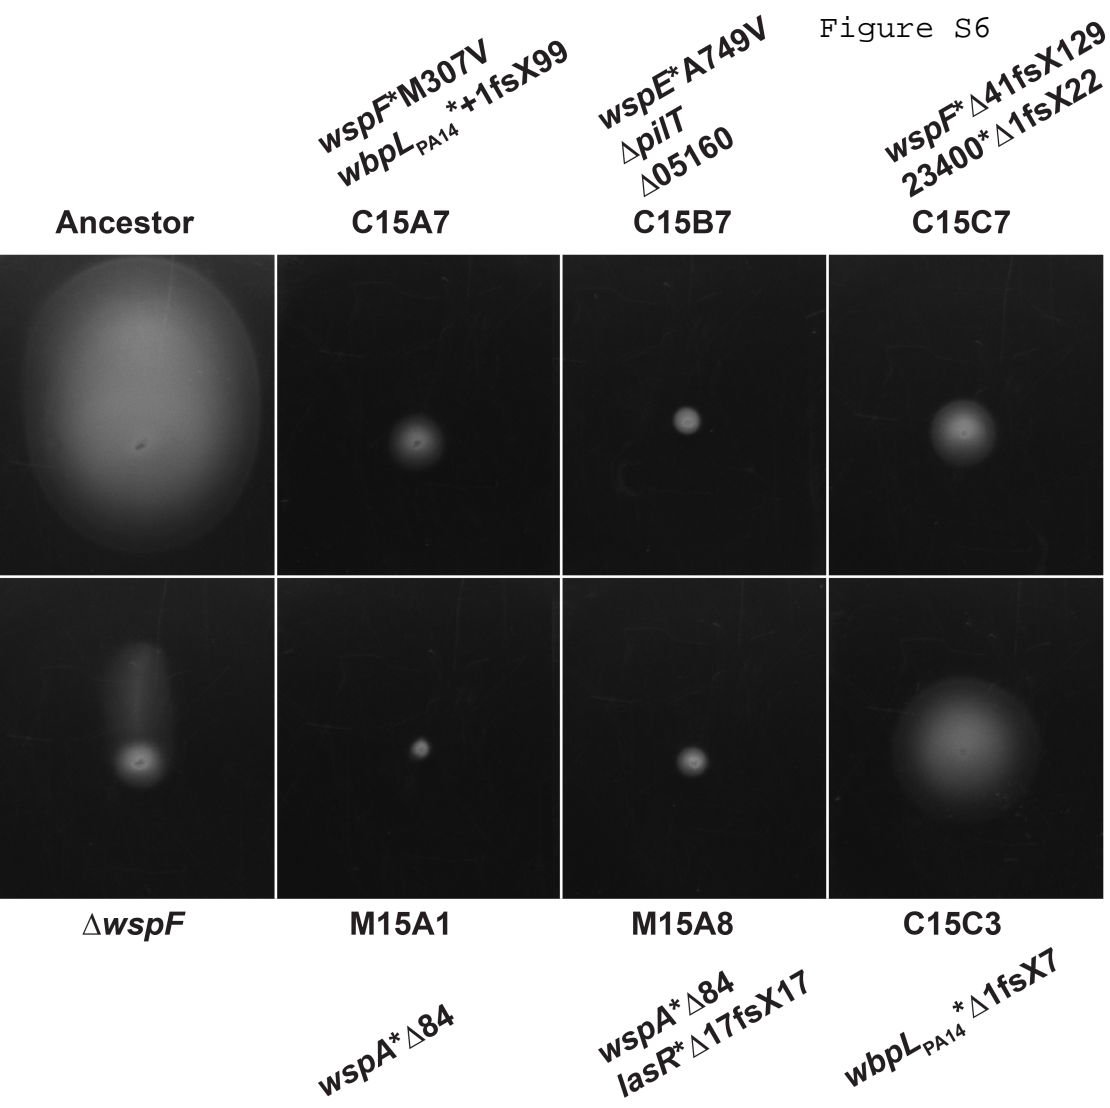

Supplement: ismej201783x10.pdf [file ismej201783x10.pdf]

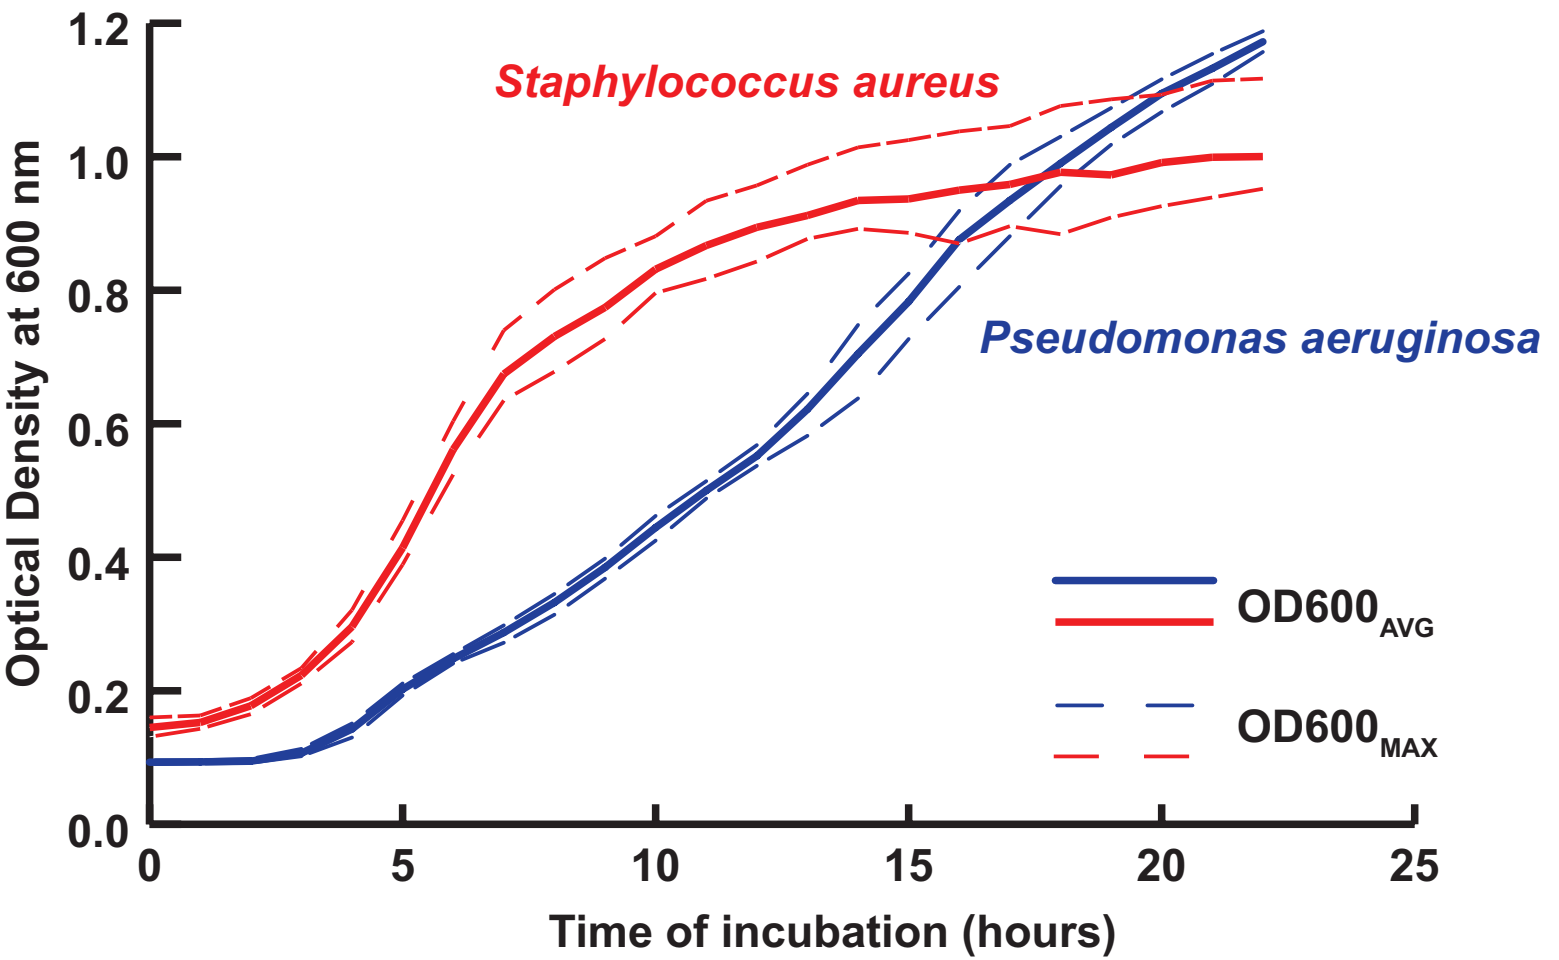

Supplement: ismej201783x5.pdf [file ismej201783x5.pdf]

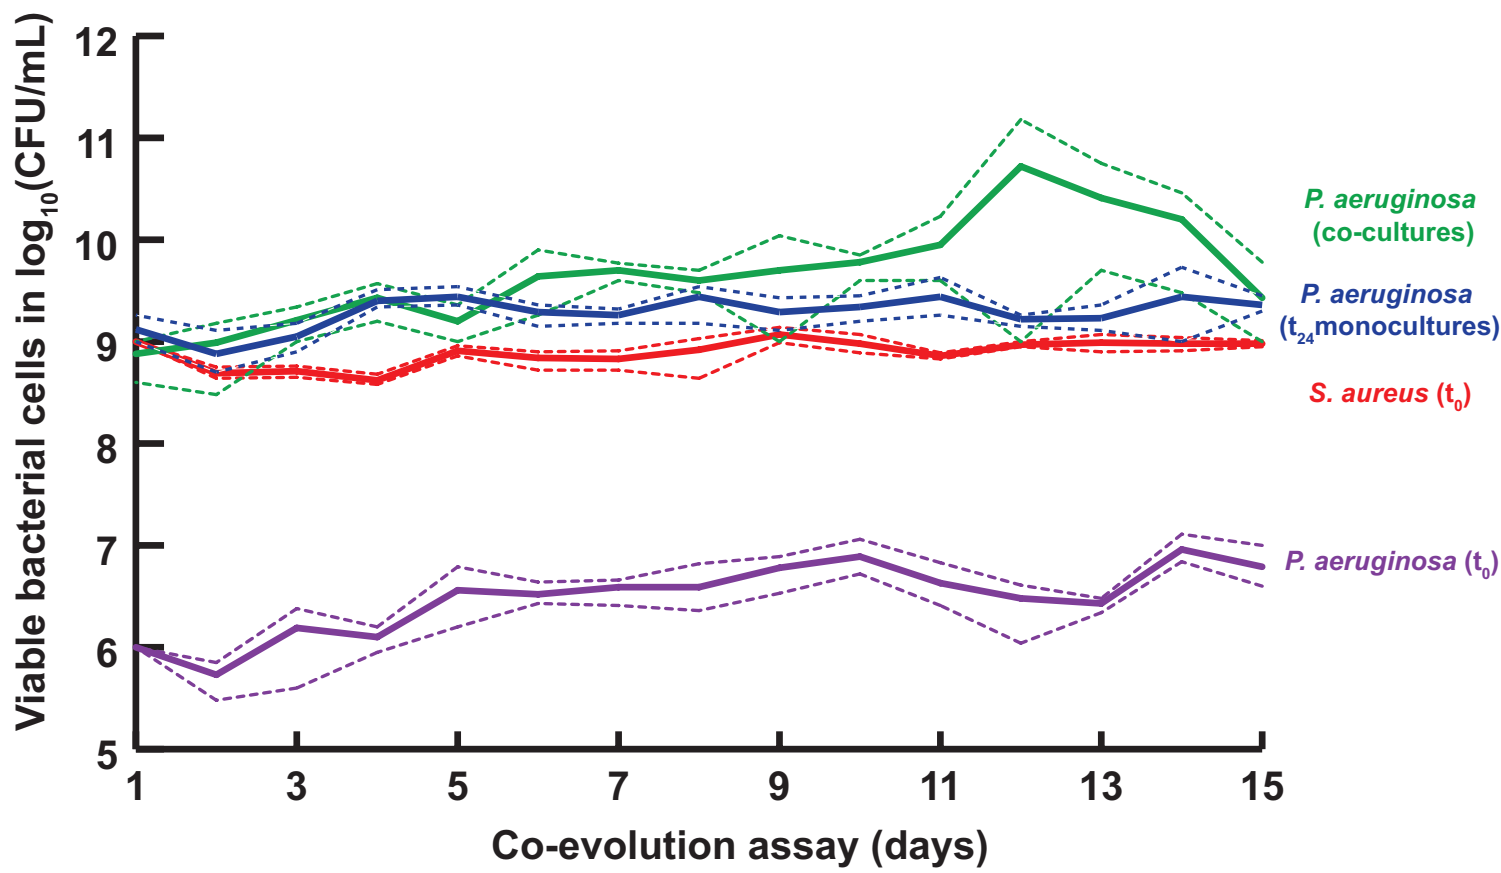

Supplement: ismej201783x6.pdf [file ismej201783x6.pdf]

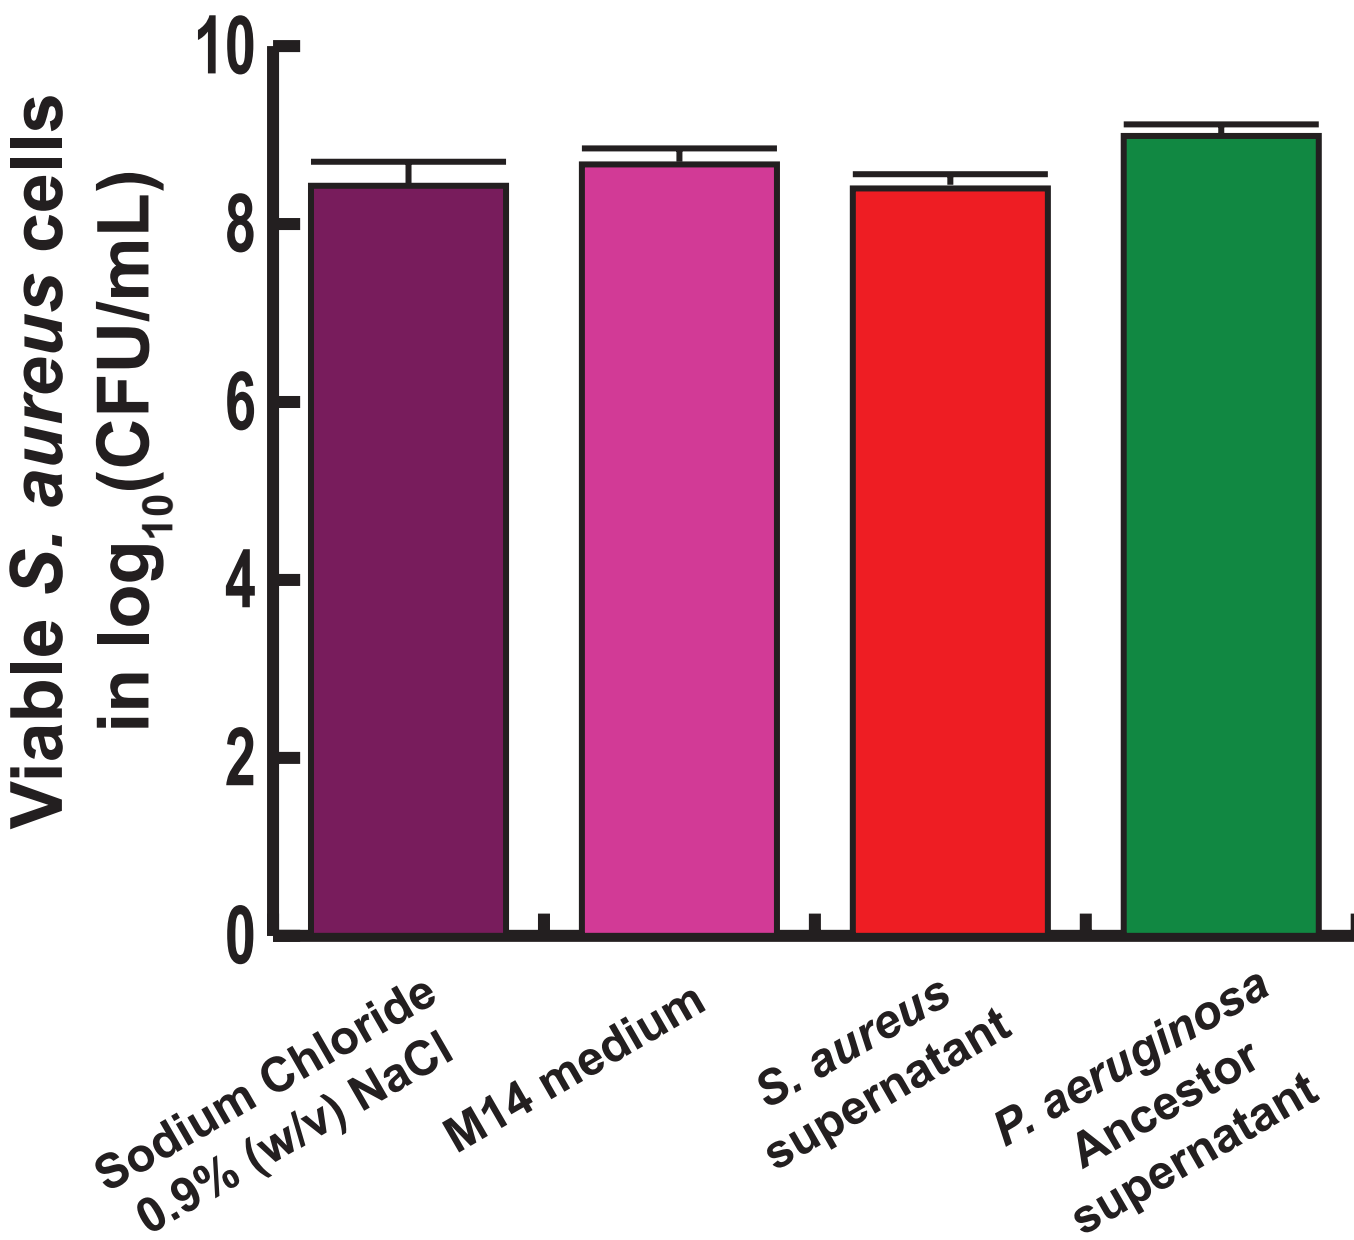

Supplement: ismej201783x7.pdf [file ismej201783x7.pdf]

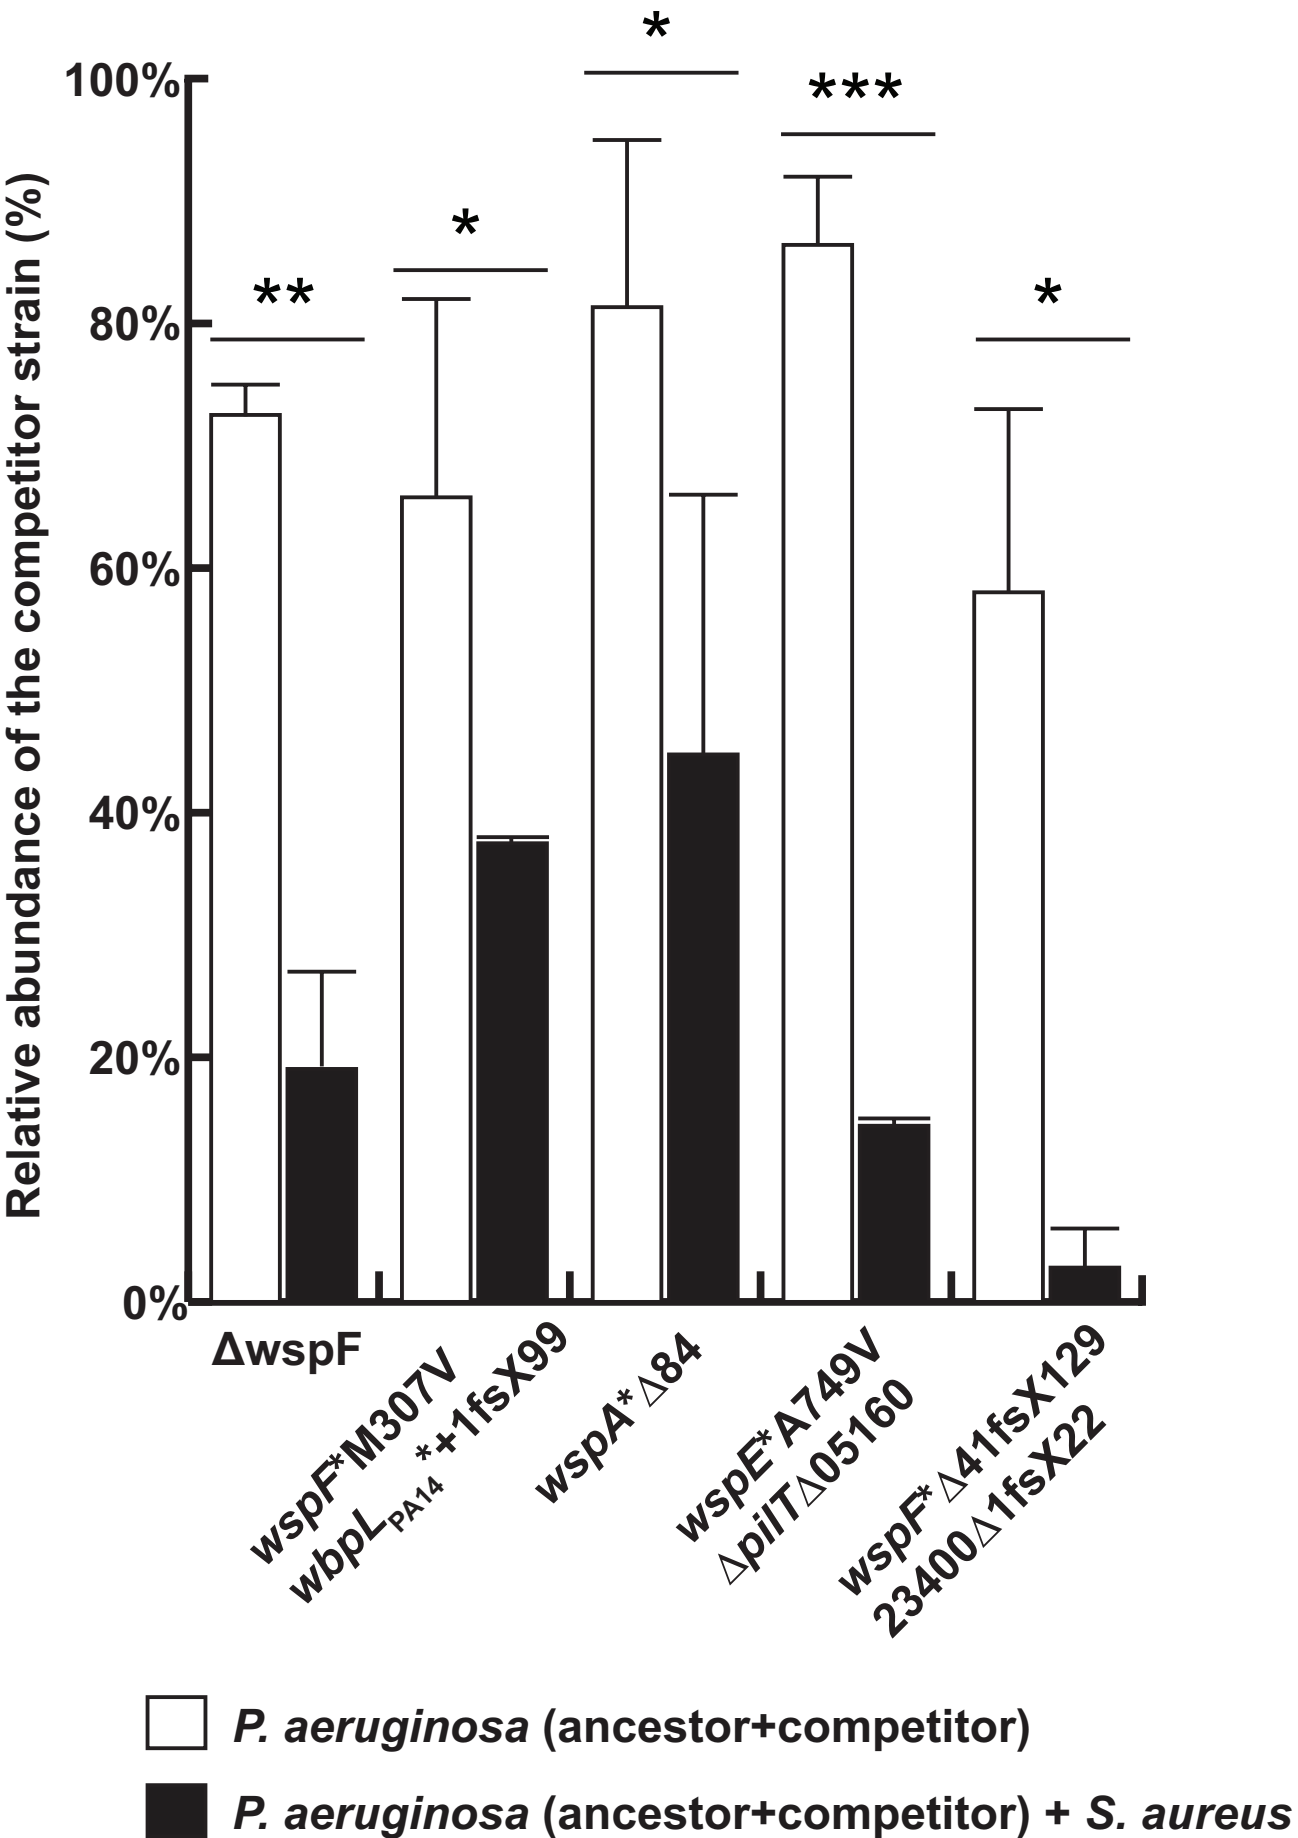

Supplement: ismej201783x9.pdf [file ismej201783x9.pdf]
